# Supplementary material for: MicroRNA-216a-5p suppresses esophageal squamous cell carcinoma progression by targeting KIAA0101
Source: PubMed Central journal article supplement — Oncol Rep. 2020 Sep 4;44(5):1971–84. doi: 10.3892/or.2020.7751 (PMC7551273; doi:10.3892/or.2020.7751), 2020-09-04

Figure S1. Confirmation of the transfections. (A) The transfections of the miR-216a-5p mimic and anti-miR-216a-5p were confirmed by RT-PCR. \* $P < 0.05$ , \*\* $P < 0.01$ . (B) The transfection with KIAA0101 alone (+KIAA0101) increased the protein expression of KIAA0101 in EC9706 and TE1 cells, while transfection with the KIAA0101-targeted shRNA (-sh) decreased the expression of KIAA0101.

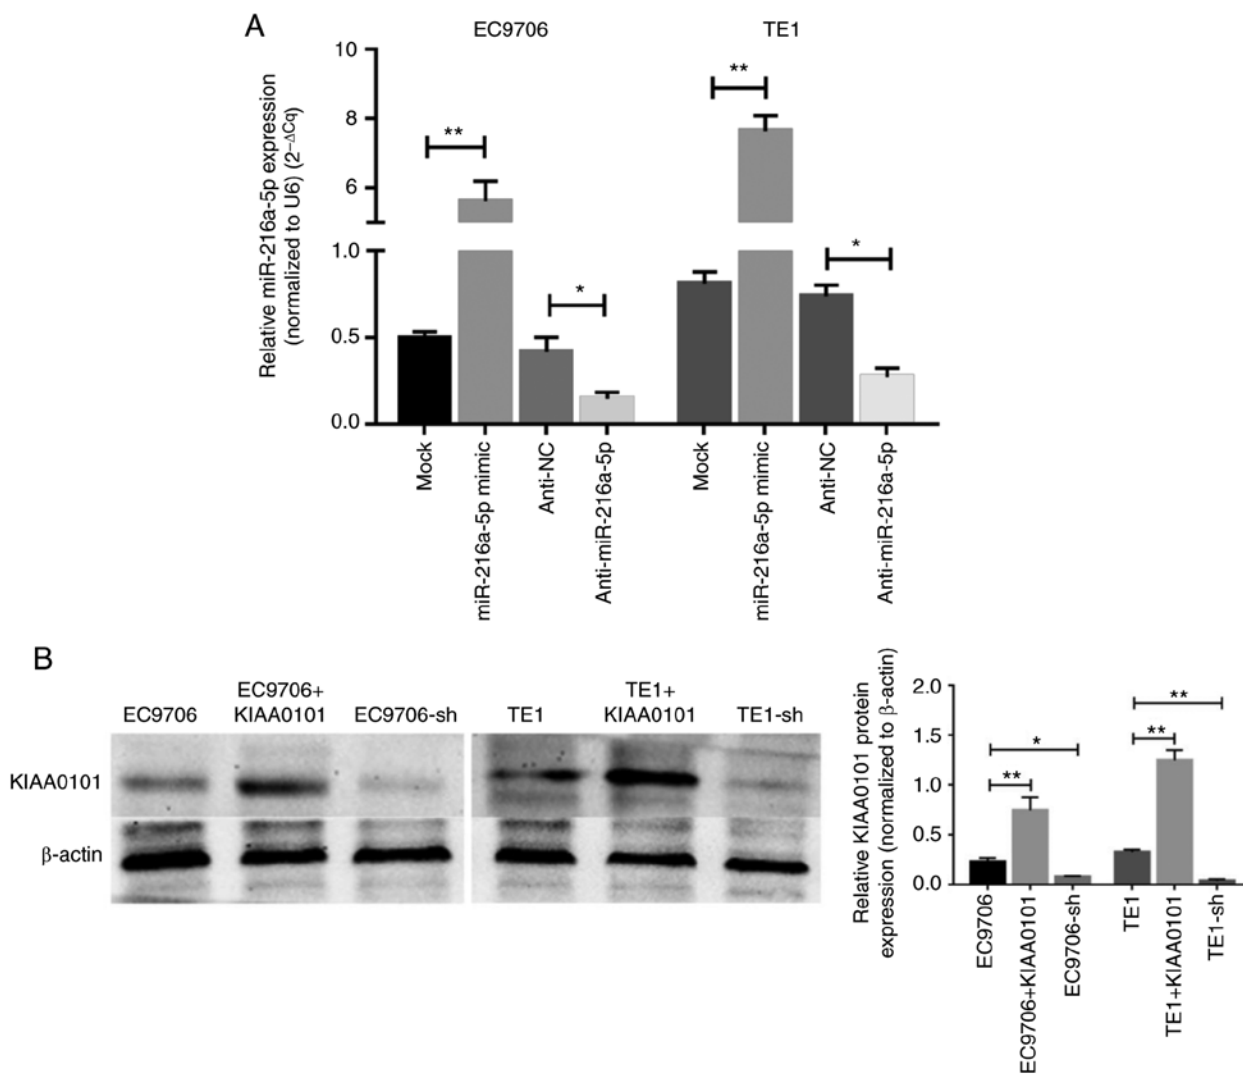

Supplement: Supplementary_Data.pdf [file Supplementary_Data.pdf]
